# Supplementary material for: Fibroblast mechanotransduction network predicts targets for mechano-adaptive infarct therapies
Source: eLife journal article supplement (doi:10.7554/elife.62856), 2022-02-09
Supplement: supp [file elife-62856-supp-v1.zip]

Archive with 10 entries (10 files):
- elife_poa_e62856_Transparent_Reporting_File.docx
- elife_poa_e62856_Figure_1_figure_supplement_1.pdf
- elife_poa_e62856_Figure_2_figure_supplement_1.pdf
- elife_poa_e62856_Figure_3_figure_supplement_1.pdf
- elife_poa_e62856_Figure_4_figure_supplement_1.pdf
- elife_poa_e62856_Figure_5_figure_supplement_1.pdf
- elife_poa_e62856_Figure_6_figure_supplement_1.pdf
- elife_poa_e62856_Figure_6_source_data_1.xlsx
- elife_poa_e62856_Supplementary_file_1.xlsx
- elife_poa_e62856_Supplementary_file_2.xlsx
