# Supplementary material for: Fibroblast mechanotransduction network predicts targets for mechano-adaptive infarct therapies
Source: eLife journal article supplement (doi:10.7554/elife.62856), 2022-02-09
Supplement: supp [file elife-62856-supp-v1.zip › elife_poa_e62856_Figure_6_source_data_1.xlsx]

## Sheet: Sheet1
	This table presents the source data for Figure 6, panel C, indicating the total collagen fluorescent intensity across the 12 experimental groups.
	Methods for these experiments and data analysis are detailed in the full paper.
		Mechanical Condition	Low Stiffness	Low Stiffness	Low Stiffness	Low Stiffness	Low Stiffness	Low Stiffness	High Stiffness	High Stiffness	High Stiffness	High Stiffness	High Stiffness	High Stiffness
		Compound 1	Niclosamide	SC144	Rosuvastatin	Niclosamide	SC144	Rosuvastatin	Niclosamide	SC144	Rosuvastatin	Niclosamide	SC144	Rosuvastatin
		Compound 2	LY294002	LY294002	LY294002	Everolimus	Everolimus	Everolimus	LY294002	LY294002	LY294002	Everolimus	Everolimus	Everolimus
		Biological Replicate 1	-0.057991	-0.0233994	0.0527538	-0.0415588	-0.0182829	-0.0560013	0.0456502	0.0268219	0.0270133	0.0320272	0.0882798	0.0189725
		Biological Replicate 2	-0.0116822	-0.0623462	-0.0483307	-0.0105381	-0.0238346	-0.0656753	0.0704285	0.0541225	-0.00275476	0.00555255	0.0518823	0.0424356
		Biological Replicate 3	0.000733082	-0.0378695	-0.0146273	-0.0404078	-0.0620189	-0.0145464	0.124705	-0.0493098	-0.00485499	0.0762653	0.0217199	0.0722438
