# Supplementary material for: Fibroblast mechanotransduction network predicts targets for mechano-adaptive infarct therapies
Source: eLife journal article supplement (doi:10.7554/elife.62856), 2022-02-09
Supplement: supp [file elife-62856-supp-v1.zip › elife_poa_e62856_Supplementary_file_1.xlsx]

## Sheet: species
Species information
module	ID	name	Yinit	Ymax	tau	type	gene name	notes
g-coupled	AngII	angiotensin II	0	1	1	protein	AGT
g-coupled	AT1R	angiotensin II receptor type 1	0	1	0.1	protein	AGTR1
g-coupled	AGT	angiotensinogen	0	1	10	protein	AGT
g-coupled	ACE	angiotensin converting enzyme	0	1	0.1	protein	ACE; ACE2
g-coupled	NOX	NAD(P)H oxidase	0	1	0.1	protein	NOX4; NOX5
g-coupled	ROS	reactive oxygen species	0	1	0.1	protein
g-coupled	ET1	endothelin 1	0	1	1	protein	EDN1
g-coupled	ETAR	endothelin 1 receptor A	0	1	0.1	protein	EDNRA
g-coupled	DAG	diacyl-glycerol	0	1	0.1	small
g-coupled	PKC	protein kinase C	0	1	0.1	protein	PRKCA; PRKCE;
pressure/stretch	TRPC	transient receptor potential canonical	0	1	0.1	protein	TRPC6;TRPC3
g-coupled	NE	norepinephrine	0	1	1	small
g-coupled	BAR	beta adrenergic receptor 1 or 2	0	1	0.1	protein	ADRB1; ADRB2
g-coupled	AC	adenylate cyclase	0	1	0.1	protein	ADCY6
g-coupled	cAMP	cyclic adenosine monophosphate	0	1	0.1	small
g-coupled	PKA	protein kinase A	0	1	0.1	protein	PRKACA
g-coupled	CREB	cAMP response-element binding protein	0	1	0.1	protein	CREB1; CREB3
g-coupled	CBP	CREB - binding protein	0	1	0.1	protein	CREBBP
growth factor	TGFB	transforming growth factor beta 1	0	1	1	protein	TGFB1
growth factor	TGFB1R	TGFB receptor	0	1	0.1	protein	TGFBR1; TGFBR2
growth factor	smad3	small mothers against decapentaplegic 2 and 3	0	1	0.1	protein	SMAD2; SMAD3
growth factor	smad7		0	1	10	protein	SMAD7
growth factor	latentTGFB	TGFB1 with latent protein complex	0	1	10	protein	TGFB1
growth factor	BAMBI	BMP and activin bound inhibitor	0	1	0.1	protein	BAMBI
growth factor	PDGF	platelet derived growth factor	0	1	1	protein	PDGFA; PDGFB; PDGFD
growth factor	PDGFR	platelet derived growth factor receptor	0	1	0.1	protein	PDGFRA; PDGFRB
g-coupled	NP	natriuretic peptide	0	1	1	protein	NPPA; NPPB
g-coupled	NPRA	natriuretic peptide receptor	0	1	0.1	protein	NPR1; NPR2; NPR3
g-coupled	cGMP	cyclic guanosine monophosphate	0	1	0.1	small
g-coupled	PKG	protein kinase G	0	1	0.1	protein	PRKG1
pressure/stretch	tension	stretch	0	1	1	process
pressure/stretch	B1int	beta 1 integrin	0	1	0.1	protein	ITGB1
pressure/stretch	Rho	a Rho-dependent GTPase	0	1	0.1	protein	RHOA
pressure/stretch	ROCK	rho associated protein kinase	0	1	0.1	protein	ROCK1
pressure/stretch	Ca	calcium	0	1	0.1	small
pressure/stretch	calcineurin	calcineurin	0	1	0.1	protein	PPP3CA; PPP3CB
pressure/stretch	NFAT	nuclear factor of activated T-cells	0	1	0.1	protein	NFATC1
cytokine	IL6	interleukin-6	0	1	1	protein	IL6
cytokine	gp130	IL-6 receptor complexed to gp130 for signal transduction	0	1	0.1	protein	IL6ST; IL6R
cytokine	STAT	signal transducers and activators of transcription 1 and 3	0	1	0.1	protein	STAT1; STAT3
cytokine	IL1	interleukin-1 alpha and beta	0	1	1	protein	IL1B; IL1A
cytokine	IL1RI	IL1 receptor type I	0	1	0.1	protein	IL1R1
cytokine	TNFa	tissue necrosis factor alpha	0	1	1	protein	TNF
cytokine	TNFaR	TNF alpha receptor	0	1	0.1	protein	TNFRSF1A;TNFRSF1B
cytokine	NFKB	nuclear factor kappa-light-chain-enhancer of activated B cells	0	1	0.1	protein	NFKB1
cytokine	PI3K	phosphoinositide 3-kinase	0	1	0.1	protein	PIK3CA
cytokine	Akt	protein kinase B	0	1	0.1	protein	AKT1; AKT2; AKT3
MAPK	p38	a MAP kinase	0	1	0.1	protein	MAPK14
MAPK	TRAF	tnf receptor associated factor either 2/6	0	1	0.1	protein	TRAF6
MAPK	ASK1	apoptosis signal related kinase 1	0	1	0.1	protein	MAP3K5
MAPK	MKK3	mitogen activated protein kinase kinase	0	1	0.1	protein	MAP2K3
MAPK	PP1	protein phosphatase 1	0	1	0.1	protein	PPP1CA; PPP1CB; PPP1CC
MAPK	JNK	a MAP kinase	0	1	0.1	protein	MAPK8
MAPK	abl	abl tyrosine kinase	0	1	0.1	protein	ABL1; ABL2
MAPK	Rac1	a Rho-dependent GTPase	0	1	0.1	protein	RAC1
MAPK	MEKK1	a MAP3K associated with p38 and JNK	0	1	0.1	protein	MAP3K1
MAPK	MKK4	a MAP2K associated with p38 and JNK	0	1	0.1	protein	MAP2K4
MAPK	ERK	a MAP kinase	0	1	0.1	protein	MAPK1; MAPK3
MAPK	Ras	representing the family of GTPases	0	1	0.1	protein	KRAS
MAPK	Raf	family of raf protein serine/threonine kinases	0	1	0.1	protein	RAF1
MAPK	MEK1	a MAP2K mainly specific to ERK	0	1	0.1	protein	MAP2K1
adhesion	FAK	focal adhesion kinase	0	1	0.1	protein	PTK2
g-coupled	epac	exchange protein activated by cAMP 1	0	1	0.1	protein	RAPGEF3
adhesion	Factin	polymerized actin	0	1	1		ACTG1
adhesion	FA	stabilization of focal adhesions	0	1	1	complex
growth	cmyc	myc transcription factor	0	1	0.1	protein	MYC
ECM	CTGF	connective tissue growth factor	0	1	0.1	protein	CTGF
growth	proliferation	proliferation	0	1	10	event
adhesion	SRF	serum response factor	0	1	0.1	protein	SRF
ECM	EDAFN	extra domain A of fibronectin	0	1	10	protein	FN1
adhesion	aSMA	alpha-smooth muscle actin	0	1	10	protein	ACTA2
MAPK	AP1	activator protein 1	0	1	0.1	protein	JUN; FOS
ECM	TIMP1	tissue inhibitor of metalloproteinase 1	0	1	10	protein	TIMP1
ECM	TIMP2	tissue inhibitor of metalloproteinase 2	0	1	10	protein	TIMP2
ECM	PAI1	plasminogen activator inhibitor 1	0	1	10	protein	SERPINE1
ECM	proMMP14	inactive MMP14	0	1	10	protein	MMP14
ECM	proMMP1	inactive MMP1	0	1	10	protein	MMP1
ECM	proMMP2	inactive MMP2	0	1	10	protein	MMP2
ECM	proMMP9	inactive MMP9	0	1	10	protein	MMP9
ECM	fibronectin	fibronectin	0	1	10	protein	FN1
ECM	periostin	periostin	0	1	10	protein	POSTN
ECM	proCI	procollagen I	0	1	10	protein	COL1A1
ECM	proCIII	procollagen III	0	1	10	protein	COL3A1
pressure/stretch	B3int	beta 3 integrin	0	1	0.1	protein	ITGB3
adhesion	Src	proto-oncogene tyrosine-protein kinase Src	0	1	0.1	protein	SRC1
MAPK	Grb2	growth factor receptor-bound protein 2	0	1	0.1	protein	GRB2
adhesion	p130Cas	breast cancer anti-estrogen resistance protein 1	0	1	0.1	protein	BCAR1
pressure/stretch	YAP	yes-associated protein 1	0	1	0.1	protein	YAP1
adhesion	MRTF	myocardin-related transcription factor A	0	1	0.1	protein	MRTFA; MKL1
adhesion	Gactin	monomeric actin	0	1	1	protein	ACTG1
ECM	TNC	tenascin-c	0	1	10	protein	TNC
growth	mTORC1	mammalian target of rapamyocin complex 1	0	1	0.1	complex
growth	mTORC2	mammalian target of rapamyocin complex 2	0	1	0.1	complex
growth	p70S6K	p70-S6 kinase 1	0	1	0.1	protein	RPS6KB1
growth	EBP1	eukaryotic translation initiation factor 4E-binding protein 1	0	1	0.1	protein	EIF4EBP1
pressure/stretch	syndecan4	syndecan 4	0	1	0.1	protein	SDC4
ECM	proMMP3	inactive MMP3	0	1	10	protein	MMP3
ECM	proMMP8	inactive MMP8	0	1	10	protein	MMP8
ECM	proMMP12	inactive MMP12	0	1	10	protein	MMP12
ECM	thrombospondin4	thrombospondin 4	0	1	10	protein	THBS4
ECM	osteopontin	osteopontin	0	1	10	protein	SPP1
adhesion	contractility	intracellular tension	0	1	10	event
pressure/stretch	RhoGEF	a Rho guanine nucleotide exchange factor	0	1	0.1	protein
pressure/stretch	RhoGDI	a Rho GDP-dissociation inhibitor	0	1	0.1	protein
adhesion	talin	talin 1	0	1	0.1	protein	TLN1
adhesion	vinculin	vinculin	0	1	0.1	protein	VCL
adhesion	paxillin	paxillin	0	1	0.1	protein	PXN
adhesion	MLC	myosin regulatory light chain	0	1	0.1	protein	MYL2
g-coupled	AT2R	angiotensin II receptor type 2	0	1	0.1	protein	AGTR2

## Sheet: reactions
Reaction Information
module	ID	Rule	Weight	n	EC50	source	notes	PMID	Secondary Reference	PMID	Tertiary Reference PMID	AND references
input	i1	=> AngII	0.1	1.25	0.6	neonatal rat cardiac fibroblasts	increased via RAS in hypertension and heart failure	10362677
input	i2	=> TGFB	0.1	1.25	0.6		increased in response to injury	20538689
input	i3	=> tension	0.1	1.25	0.6		increased with integrin stimulation	9547793
input	i4	=> IL6	0.1	1.25	0.6		increased in hypertension	19234091
input	i5	=> IL1	0.1	1.25	0.6			19631653
input	i6	=> TNFa	0.1	1.25	0.6			10591022
input	i7	=> NE	0.1	1.25	0.6		most likely NE signaling	3948363
input	i8	=> PDGF	0.1	1.25	0.6		increased post-MI	20538689
input	i9	=> ET1	0.1	1.25	0.6		increased from stretch of vascular endothelial cells	12695528
input	i10	=> NP	0.1	1.25	0.6		increased in pressure	17991884
fback	r1	proMMP9 & latentTGFB => TGFB	0.8	1.25	0.6	in vitro	release of latent protein	10652271	MC3T3-E1	12226090
fback	r2	proMMP2 & latentTGFB => TGFB	0.8	1.25	0.6	in vitro	release of latent protein	10652271	MC3T3-E1	12226090
fback	r3	ACE & AGT => AngII	0.8	1.25	0.6	neonatal cardiac fibroblasts	enzymatic modification	10790312	in vitro	13295487
output/fback	r4	CREB + CBP => IL6	0.8	1.25	0.6	neonatal rat cardiac fibroblasts	txn	11597988	mouse cardiac fibroblasts	16466739	10405202
output/fback	r5	NFKB => IL6	0.8	1.25	0.6	neonatal rat cardiac fibroblasts	txn	11597988		16466739
output/fback	r6	AP1 => IL6	0.8	1.25	0.6	neonatal cardiac fibroblasts	txn	11597988	sv40 murine cells	16466739
output/fback	r7	AP1 => ET1	0.8	1.25	0.6	neonatal rat cardiac fibroblasts	txn	12695528	bovine aortic endothelial cells	1918021
middle	r8	AngII => AT1R	1	1.25	0.6	neonatal cardiac fibroblasts	receptor binding	8348686	adult rat cardiac fibroblasts	16024575
middle	r9	AT1R => NOX	1	1.25	0.6	adult rat cardiac fibroblast	-	15106793	neonatal rat cardiac fibroblasts	11597988
middle	r10	NOX => ROS	1	1.25	0.6	adult rat cardiac fibroblast	enzymatic production	15106793	adult rat cardiac fibroblasts	16531806
middle	r11	IL6 => gp130	1	1.25	0.6	neonatal rat cardiac fibroblasts	receptor binding	19234091	COS7 cells	1602143
middle	r12	ROS => p38	1	1.25	0.6	neonatal rat cardiac fibroblasts	activation	11597988	neonatal rat cardiac fibroblasts	24882408	12695528
middle	r13	ROS => JNK	1	1.25	0.6	neonatal rat cardiac fibroblasts	activation	11597988	neonatal rat cardiac fibroblasts	12695528
middle	r14	IL1RI => NFKB	1	1.25	0.6	neonatal rat cardiac fibroblasts	release of blocking and increased abundance	11597988	human foreskin fibroblasts	1906501
middle	r15	gp130 => STAT	1	1.25	0.6	neonatal mouse fibroblasts	activation (via JAK)	19234091	murine proB cell line	9874564
middle	r16	TNFaR => PI3K	1	1.25	0.6	human cardiac fibroblasts	activation	17560598	human cardiac fibroblast	17612514
middle	r17	!AT1R & !JNK & p38 => AGT	1	1.25	0.6	neonatal rat cardiac fibroblasts	txn	18926830	neonatal rat cardiac fibroblasts	21131638		11192370
middle	r18	TGFB1R & !PKG & !smad7 => smad3	1	1.25	0.6	adult rat cardiac fibroblast	activation	17513491	COS7 cells	9335507, 9215638		17991884, 17038494
output	r19	smad3 & CBP & ERK => CTGF	1	1.25	0.6	neonatal rat cardiac fibroblasts	txn	18586263	mouse cardiac fibroblasts	22749815	11013125	12368229, 16959941
output	r20	STAT => proMMP2	1	1.25	0.6	neonatal rat cardiac fibroblasts	txn	15350851	human lung cell lines	24573038
output	r21	STAT => proMMP9	1	1.25	0.6	mouse cardiac fibroblasts	txn	19234091	human genome database	18258475
output	r22	smad3 & CBP => periostin	1	1.25	0.6	adult rat cardiac fibroblasts	txn	21367774	gingival fibroblasts	24004653		16959941
output	r23	CREB & CBP => periostin	1	1.25	0.6	adult rat cardiac fibroblasts	txn	21367774	murine dermal fibroblast	24577408		16959941
middle	r24	ERK => NFKB	1	1.25	0.6	human cardiac fibroblast	activation	17921324	periodontal ligament fibroblast	21757573
middle	r25	p38 => NFKB	1	1.25	0.6	human cardiac fibroblast	activation	17921324	NIH-3T3 (via CBP)	11259436
output	r26	NFKB & AP1 & !smad3 => proMMP1	1	1.25	0.6	human cardiac fibroblast	txn	17921324	human dermal fibroblasts	11502752	12525489
middle	r27	ETAR => ROS	1	1.25	0.6	neonatal rat cardiac fibroblasts	activation	12695528	neonatal rat cardiac fibroblasts	16391241
middle	r28	ERK => AP1	1	1.25	0.6	neonatal rat cardiac fibroblasts	activation	12695528	human lung fibroblast	10862759
output	r29	AP1 => proMMP2	1	1.25	0.6	human cardiac fibroblasts	txn	17921324	neonatal rat cardiac fibroblasts	12371906
output	r30	AP1 & NFKB => proMMP9	1	1.25	0.6	human cardiac fibroblasts	txn	17560598	human foreskin fibroblasts	9755853
output	r31	AP1 => TIMP1	1	1.25	0.6	human cardiac fibroblasts	txn	17921324	human foreskin fibroblasts	9182725
output	r32	AP1 => TIMP2	1	1.25	0.6	human cardiac fibroblast	txn	17921324	3T3 and rat fibroblast	8112602
middle	r33	PKC & tension => B1int	1	1.25	0.6	adult rat cardiac fibroblasts	activation	15949469	mouse embryonic fibroblasts	12110574	21131638
middle	r34	cAMP => PKA	1	1.25	0.6	adult rat cardiac fibroblasts	activation	11054474	cardiac fibroblast	21977288
output	r35	smad3 & CBP => fibronectin	1	1.25	0.6	human lung fibroblast	txn	16707625	human cardiac fibroblast	11013125
middle	r36	!smad3 => CBP	1	1.25	0.6	adult rat cardiac fibroblasts	depletion of txn factor binding partner	16959941	human dermal fibroblasts	10918613
middle	r37	!CREB => CBP	1	1.25	0.6	adult rat cardiac fibroblasts	depletion of txn factor binding partner	16959941	3T3 cells	8028671
middle	r38	tension => B1int	1	1.25	0.6	neonatal rat cardiac fibroblasts	activation	21131638	NIH-3T3	15760908
output	r39	NFAT => EDAFN	1	1.25	0.6	neonatal mice cardiac fibroblast	txn activation	23178899	rat cardiac fibroblasts	23142541
middle	r40	TGFB1R => ACE	1	1.25	0.6	rat cardiac fibroblasts	increased txn	11967821	human cardiac myofibroblasts	18223028
middle	r41	TGFB & !BAMBI => TGFB1R	1	1.25	0.6	mice cardiac fibroblast	binding to receptor	22960625	mouse cardiac fibroblasts	24078695
middle	r42	AP1 => proliferation	1	1.25	0.6	adult rat cardiac fibroblasts	via activation of Kca3.1 channels	23500546	adult rat cardiac fibroblasts	17483238
middle	r43	PKA => CREB	1	1.25	0.6	rat cardiac fibroblasts	activation	11054474	mouse embryonic fibroblasts	11909979
middle	r44	CREB => proliferation	1	1.25	0.6	rat cardiac fibroblasts		11054474	rat cardiac fibroblasts	17483238
middle	r45	NE => BAR	1	1.25	0.6	rat cardiac fibroblasts	receptor binding	11054474	rat pineal gland	7700241
middle	r46	ET1 => ETAR	1	1.25	0.6	neonatal rat cardiac fibroblasts	receptor binding	12695528	adult rat cardiac fibroblasts	8313418
middle	r47	CTGF => proliferation	1	1.25	0.6	human cardiac fibroblast		11013125	rat cardiac fibroblasts	17483238
middle	r48	IL1 => IL1RI	1	1.25	0.6	mouse cell line	receptor binding	8327496	neonatal rat cardiac fibroblasts	7769098
middle	r49	PKC => proliferation	1	1.25	0.6	adult rat cardiac fibroblasts	activation	10756114	adult rat cardiac fibroblasts	17483238
output	r50	smad3 & CBP & !epac => proCI	1	1.25	0.6	adult rat cardiac fibroblasts	txn	17513491	adult rat cardiac fibroblasts	17513491	11279127	18434542, 23845590
output	r51	smad3 & CBP & !epac => proCIII	1	1.25	0.6	adult rat cardiac fibroblasts	txn	17513491	adult rat cardiac fibroblasts	17513491	11279127	18434542, 23845590
output	r52	AP1 => proMMP14	1	1.25	0.6	mouse cardiac fibroblasts	correlated increase with cFOS	22287584	mouse embryonic fibroblasts	17348021
middle	r53	PDGF => PDGFR	1	1.25	0.6	adult rat cardiac fibroblasts	receptor binding	11230972	rat cardiac fibroblasts	24427322
middle	r54	BAR => AC	1	1.25	0.6	adult rat cardiac fibroblasts	activation	12711600	rat cardiac fibroblasts	17934720
middle	r55	BAR & AT1R => AC	1	1.25	0.6	adult rat cardiac fibroblasts	activation with potentiation	12711600	rat dermal fibroblasts	1330500
middle	r56	AC => cAMP	1	1.25	0.6	adult rat cardiac fibroblasts	activation	12711600	human pulmonary fibroblast	15075208
middle	r57	FAK =>MEKK1	1	1.25	0.6	mouse embryonic fibroblasts	activation	17409352	mouse embryonic fibroblasts	12458213	21131638
output	r58	AP1 => latentTGFB	1	1.25	0.6	mouse lung fibroblasts	txn activation	20141610	adult rat cardiac fibroblasts	21367774	22429882, 19374881
middle	r59	cAMP => epac	1	1.25	0.6	adult rat cardiac fibroblasts	activation	18434542	NIH-3T3	9853756
middle	r60	Rho => ROCK	1	1.25	0.6	rat embryonic fibroblasts	activation	16043513	rat cardiac fibroblasts	17456553
middle	r61	TNFa => TNFaR	1	1.25	0.6	human cardiac fibroblast	receptor binding	17560598	mouse cardiac fibroblasts	23337087
middle	r62	NP => NPRA	1	1.25	0.6	human cardiac fibroblast	receptor binding	16986166	COS7 cells	11595171
middle	r63	NPRA => cGMP	1	1.25	0.6	adult rat cardiac fibroblast	activation	17991884	human cardiac fibroblast	16986166
middle	r64	cGMP => PKG	1	1.25	0.6	adult rat cardiac fibroblast		17991884	mouse cardiac fibroblasts	21282499
middle	r65	Ras => Raf	1	1.25	0.6	neonatal rat cardiac fibroblast	possibly via recruitment and Src phosphorylation	9486662	NIH-3T3	8668210
middle	r66	Raf & !ERK => MEK1	1	1.25	0.6	adult rat cardiac fibroblast		12388314	NIH-3T3	8668210		21943356, 24489118
middle	r67	MEK1 & !PP1=> ERK	1	1.25	0.6	adult rat cardiac fibroblast		12388314	Cos1 cells	12167697		11259586, 15972258, 25659900
middle	r68	p38 => PP1	1	1.25	0.6	3T3 cells, adult and neonatal human dermal fibroblast	via activation	11259586	human endothelial cells	15972258	25659900
middle	r69	MKK3 => p38	1	1.25	0.6	3T3 cells, adult and neonatal human dermal fibroblast	activation	11259586	human synoviocytes	15778394
middle	r70	TGFB1R => TRAF	1	1.25	0.6	adult mouse cardiac fibroblast	activation	22749815	mouse embryonic fibroblasts	18922473
middle	r71	Rac1 => MEKK1	1	1.25	0.6	NIH-3T3, HeLa	activation	7600582	ovarian cancer cells	9674706
middle	r72	MEKK1 => MKK4	1	1.25	0.6	NIH-3T3, HeLa	activation	7600582	cos1, HeLa	12401521
middle	r73	MKK4 & !NFKB => JNK	1	1.25	0.6	NIH-3T3, HeLa	activation	7600582	NIH-3T3	16076903		11713530, 11466617
middle	r74	PDGFR => abl	1	1.25	0.6	3T3	activation	16076903	mouse embryonic fibroblasts	10500097
middle	r75	abl => Rac1	1	1.25	0.6	3T3	activation	16076903	mouse embryonic fibroblasts	15039778
middle	r76	JNK => cmyc	1	1.25	0.6	3T3	activation	16076903	NIH-3T3	14523011
middle	r77	cmyc => proliferation	1	1.25	0.6	3T3	activation	16076903	NIH-3T3	15195135
middle	r78	TNFaR => TRAF	1	1.25	0.6	293 cells	activation	9774977	human cardiac fibroblast	17560598	10523862
middle	r79	TRAF => ASK1	1	1.25	0.6	293 cells	activation - most likely binding allows the receptor to eventually activate ASK1	9774977	293, cos7, mouse embryonic fibroblast	10523862
middle	r80	ASK1 => MKK3	1	1.25	0.6	COS7 cells	activation	8974401	human foreskin fibroblasts	10912795
middle	r81	ASK1 => MKK4	1	1.25	0.6	COS7 cells	activation	8974401	human embryonic lung fibroblasts	19494316	9774977
middle	r82	IL1RI => ASK1	1	1.25	0.6	fibroblast-like synoviocytes	assumed activation	15778394	human foreskin fibroblasts	10912795
middle	r83	smad3 => PAI1	1	1.25	0.6	adult mouse cardiac fibroblast	transcription	17991884	Hep2g cells	9606191	11279127
output	r84	NFKB => proMMP14	1	1.25	0.6	human dermal fibroblast	transcription	11112697	human breast cancer cell line	20855151
middle	r85	Ras => p38	1	1.25	0.6	adult rat cardiac fibroblast	unknown	21367774	human foreskin fibroblasts	14593117
middle	r86	TGFB1R => PI3K	1	1.25	0.6	adult rat cardiac fibroblast	activation	21498085	NIH-3T3	16288034
middle	r87	PDGFR => PI3K	1	1.25	0.6	3T3	activation	21943356	adult rat cardiac fibroblasts	11230972
middle	r88	FAK => PI3K	1	1.25	0.6	human lung fibroblast	activation	15166238	human bone marrow mesenchymal stem cells	25900259
middle	r89	TGFB1R => NOX	1	1.25	0.6	human cardiac fibroblast	activation	16179589	human dermal fibroblasts	26096997	25858818
middle	r90	Akt => NFKB	1	1.25	0.6	human cardiac fibroblast	activation by removal of IKK	18064631	human dermal fibroblasts, rat synoviocytes	10485711
output	r91	NFKB => fibronectin	1	1.25	0.6	human cardiac fibroblast	transcription	18064631	rat osteoblasts	17252537	23141425
middle	r92	JNK => AP1	1	1.25	0.6	human periodontal ligament fibroblast	activation	21757573	neonatal rat cardiac fibroblasts	12695528
middle	r93	IL1RI & TGFB => BAMBI	1	1.25	0.6	mice cardiac fibroblast	increased transcription (unsure of transcription factor)	24078695	adult rat cardiac fibroblasts	23734837
middle	r94	STAT => smad7	1	1.25	0.6	UA4 cell line	STAT necessary for smad expression	10067896	human lung fibroblast	11927620	22751114
output	r95	SRF => proCI	1	1.25	0.6	10t1/2 cells, cardiac fibroblasts	MRTF directly activates the expression of COL1	20558820	NIH-3T3, mouse embryonic fibroblast	24732378
middle	r96	Rho & !Rac1 => p38	1	1.25	0.6	neonatal rat cardiac fibroblast		21131638	murine mesangial cells	25007875
middle	r97	MKK4 & !Rho => JNK	1	1.25	0.6	neonatal rat cardiac fibroblast		21131638	NIH-3T3	7600582
output	r98	SRF => proCIII	1	1.25	0.6	mouse cardiac fibroblasts		20558820	NIH-3T3, mouse embryonic fibroblast	24732378
middle	r99	calcineurin => NFAT	1	1.25	0.6	mouse cardiac fibroblasts	activation/nuclear translocation	22403241	neonatal mouse cardiac fibroblast	23178899
middle	r100	AT1R => Ras	1	1.25	0.6	neonatal cardiac fibroblasts		9486662	adult rat cardiac fibroblasts	21367774
output	r101	smad3 & CBP => aSMA	1	1.25	0.6	human cardiac fibroblast	txn activation	16179589	rat gingival fibroblasts	26738448
output	r102	SRF => aSMA	1	1.25	0.6	rat cardiac fibroblasts	transcription	17456553	mouse embryonic fibroblasts	15855636
middle	r103	ETAR => DAG	1	1.25	0.6	rat embryonic fibroblasts	production	1809396	mouse embryonic fibroblasts	10676846
middle	r104	AT1R => DAG	1	1.25	0.6	CHO cells	production	7653525	rat cardiac fibroblasts	17982962
middle	r105	DAG => TRPC	1	1.25	0.6	human cardiac fibroblast	activation	17533154	adult rat cardiac fibroblasts	22992321	25521631
middle	r106	TRPC => Ca	1	1.25	0.6	human cardiac fibroblast	channel opening	23827314	adult rat cardiac fibroblasts	22992321
middle	r107	Ca => calcineurin	1	1.25	0.6	adult rat cardiac fibroblast	activation	26191219	rat dermal fibroblasts	23022034
middle	r108	TGFB1R => Rho	1	1.25	0.6	human gingivial fibroblasts		16953819	human colonic fibroblasts	24280883	29700112
middle	r109	B3int => Src	1	1.25	0.6	human lung fibroblasts	dephosphorylation: Y530, autophosphorylation: Y419	18353785	CHO cells	14593208
middle	r110	B1int => FAK	1	1.25	0.6	mouse embryonic fibroblasts, COS7	autophosphorylation: Y397	7529876	mouse embryonic fibroblasts	10413676	23589296
middle	r111	FAK & Src => Grb2	1	1.25	0.6	mouse embryonic fibroblasts	activation via Src	7997267	mouse embryonic fibroblasts	9032297	8816475
middle	r112	Grb2 => Ras	1	1.25	0.6	rat cardiac fibroblasts	activation via SOS	9486662	mouse embryonic fibroblasts, HEK293	8479541	7997267
middle	r113	FAK & Src => RhoGEF	1	1.25	0.6	mouse embryonic fibroblasts	activation	18195107	mouse embryonic fibroblasts	18303050	19339545
middle	r114	!Src => RhoGDI	1	1.25	0.6	mouse embryonic fibroblasts, HeLa	phorphorylation: decreases binding Rho binding affinity	16943322	293T	19321744
middle	r115	FAK & Src => p130Cas	1	1.25	0.6	mouse embryonic fibroblasts	activation via Src	9032297	CHO cells	9425168	16581250
middle	r116	PDGFR => Src	1	1.25	0.6	mouse embryonic fibroblasts	activation	8356071	mouse embryonic fibroblasts	10222144	9739761
middle	r117	tension & Src => p130Cas	1	1.25	0.6	mouse embryonic fibroblasts	activation	8670206	mouse embryonic fibroblasts	22499769	17129785
middle	r118	p130Cas & abl => Rac1	1	1.25	0.6	HEK293	activation	10385525	293T	18793427	17533370
middle	r119	Factin => YAP	1	1.25	0.6	mouse embryonic fibroblasts	dephosphorylation + translocation	23644383	mouse embryonic fibroblasts	26757814	24648494
middle	r120	PKA => RhoGDI	1	1.25	0.6	rat cardiac fibroblasts	phosphorylation	23012358	COS7 cells	18768928
middle	r121	RhoGEF & !RhoGDI & !PKG => Rho	1	1.25	0.6	mouse embryonic fibroblasts	activation	18303050	mouse embryonic fibroblasts	22649559	24467208	30998392	15890975
output	r122	YAP => CTGF	1	1.25	0.6	mouse embryonic fibroblasts	txn via TEAD	18579750	MCF10A	19324877	29563341
middle	r123	syndecan4 => PKC	1	1.25	0.6	rat embryonic fibroblasts	activation	22504297	rat embryonic fibroblasts	12571249	16787950
middle	r124	!PKC => RhoGDI	1	1.25	0.6	rat embryonic cardiomyocytes	phosphorylation	15316932	human umbilical vein endothelial cells	11309397
middle	r125	NFAT & !Gactin => MRTF	1	1.25	0.6	mouse cardiac fibroblasts	translocation	23178899	mouse embryonic fibroblasts	18025109	12475943	23022034
middle	r126	ROCK & Gactin => Factin	1	1.25	0.6	rat cardiac fibroblasts	polymerization	17456553	mouse embryonic fibroblasts	12732141	26721596
middle	r127	!Factin => Gactin	1	1.25	0.6	mouse embryonic fibroblasts	polymerization	12475943	mouse embryonic fibroblasts	12732141
middle	r128	MRTF => SRF	1	1.25	0.6	human lung fibroblasts		22461426	mouse embryonic fibroblasts	12732141	26721596
fback	r129	!TNC & tension => syndecan4	0.8	1.25	0.6	mouse cardiac fibroblasts	dephosphorylation	23178899	mouse dermal fibroblasts	15483051	19339214	12388760
middle	r130	Akt => mTORC1	1	1.25	0.6	HEK293	activation via TSC1/2, PRAS40 inhibition	12172553	mouse embryonic fibroblasts	16027121	19117990
middle	r131	mTORC1 => p70S6K	1	1.25	0.6	mouse embryonic fibroblasts	activation	21602892	mouse embryonic fibroblasts	16027121	19117990
middle	r132	!mTORC1 => EBP1	1	1.25	0.6	mouse embryonic fibroblasts	phosphorylation	23940704	HEK293	9465032	29518028
middle	r133	!EBP1 & p70S6K => proliferation	1	1.25	0.6	rat cardiac fibroblasts	mRNA translation	16270752	human lung fibroblasts	21784851	15522879
middle	r134	Akt => smad3	1	1.25	0.6	mouse cardiac fibroblasts	activation via GSK3B inhibition	24899689	mouse embryonic fibroblasts	19458083	17604717
output	r135	NFKB => TNC	1	1.25	0.6	human cardiac fibroblasts	txn	23454256	chick embryonic fibroblasts	15363633	20107185
output	r136	MRTF => TNC	1	1.25	0.6	mouse embryonic fibroblasts	txn	21705668	chick embryonic fibroblasts	15363633
middle	r137	!p70S6K => mTORC2	1	1.25	0.6	mouse embryonic fibroblasts	phosphorylation via Rictor	19995915	HEK293	19720745
middle	r138	mTORC2 & PI3K => Akt	1	1.25	0.6	mouse embryonic fibroblasts	activation	23311350	mouse embryonic fibroblasts	18566587	15718470
middle	r139	mTORC2 & DAG => PKC	1	1.25	0.6	HEK293	activation	15268862	mouse embryonic fibroblasts	18566587	17604717	18566587
output	r140	YAP => PAI1	1	1.25	0.6	human lung fibroblasts	txn	25502501	mouse embryonic fibroblasts	27881410
middle	r141	smad3 => thrombospondin4	1	1.25	0.6	human dermal fibroblasts	txn	30132849	mouse lung endothelial cells	28481870
fback	r142	!thrombospondin4 & tension => B3int	0.8	1.25	0.6	mouse cardiac fibroblasts	receptor binding	25987545	human ligament fibroblasts	19647831	20884877	19805288
output	r143	NFKB & AP1 & !smad3 => proMMP8	1	1.25	0.6	mouse cardiac fibroblasts	txn	30686120	human mesenchymal stem cells	24738865
output	r144	NFKB & AP1 & !smad3 => proMMP3	1	1.25	0.6	mouse cardiac fibroblasts	txn	30686120	human cardiac fibroblasts	20619343	17706606
output	r145	AP1 => osteopontin	1	1.25	0.6	rat cardiac fibroblasts	txn	14755545	rat lung fibroblasts	16211580
fback	r146	osteopontin => B3int	0.8	1.25	0.6	rat cardiac fibroblasts	receptor binding	8941637	human lung fibroblasts	16128620
output	r147	CREB => proMMP12	1	1.25	0.6	human dermal fibroblasts	txn	23671273	human foreskin fibroblasts	23671273
middle	r148	AP1 & !YAP => smad7	1	1.25	0.6	human dermal fibroblasts	txn: YAP/TAZ knock-down required for smad7 expression	29695252	mouse embryonic fibroblasts	11402315	10843994
middle	r149	FAK & Src & MLC => paxillin	1	1.25	0.6	human foreskin fibroblasts	activation	20308429	mouse embryonic fibroblasts, PAEC	17164291
middle	r150	vinculin & !paxillin => FA	1	1.25	0.6	human foreskin fibroblasts	stabilization: paxillin increases FA turnover for increased migration	18056416	mouse embryonic fibroblasts, PAEC	17164291
middle	r151	B1int => talin	1	1.25	0.6	mouse embryonic fibroblasts	activation	18056416	mouse embryonic fibroblasts	27065098
middle	r152	B3int => talin	1	1.25	0.6	mouse embryonic fibroblasts	activation	27065098	mouse fibroblast-like cells	14581461
middle	r153	talin & tension => vinculin	1	1.25	0.6	mouse embryonic fibroblasts	activation	18056416	mouse embryonic fibroblasts	27065098
middle	r154	Factin & MLC & vinculin => contractility	1	1.25	0.6	mouse embryonic fibroblasts	binding via vinculin tail region	18056416	mouse embryonic fibroblasts	23716647
fback	r155	contractility & FA => tension	0.8	1.25	0.6	human foreskin fibroblasts	force generation via molecular clutch theory	28592635	human foreskin fibroblasts	23859772	26121555
middle	r156	ROCK => MLC	1	1.25	0.6	mouse embryonic fibroblasts	activation via MLCK activation, MBS inhibition	10953004	rat embryonic fibroblasts	16043513
middle	r157	tension => TRPC	1	1.25	0.6	mouse embryonic fibroblasts	activation	26108359	mouse synovial fibroblasts	23053481	32079284
middle	r158	tension => AT1R	1	1.25	0.6	rat cardiac fibroblasts	activation	22020089	neonatal rat cardiac fibroblasts	27703175	19261744	15146194
middle	r159	AT1R => YAP	1	1.25	0.6	rat cardiac fibroblasts	dephosphorylation + translocation	32239716	mouse embryonic fibroblasts	30926167
middle	r160	YAP => aSMA	1	1.25	0.6	rat cardiac fibroblasts	txn	32239716	human lung fibroblasts	25502501	28390245
middle	r161	AngII => AT2R	1	1.25	0.6	human cardiac fibroblasts	activation	9815151	mouse peritoneal fibroblasts	32711180	9453327
middle	r162	ROS & !AT2R => ERK	1	1.25	0.6	neonatal rat cardiac fibroblasts	activation	11597988	neonatal rat cardiac fibroblasts	14642698	12695528	9815151
