# Supplementary material for: Fibroblast mechanotransduction network predicts targets for mechano-adaptive infarct therapies
Source: eLife journal article supplement (doi:10.7554/elife.62856), 2022-02-09
Supplement: supp [file elife-62856-supp-v1.zip › elife_poa_e62856_Supplementary_file_2.xlsx]

## Sheet: Sheet1
ID	Input	InputCode	Output	Prediction	Measurement	in-out	'match'	Reference	Cell Type	Notes	Add. Ref	Notes	Contra Ref	Notes
v1	TGFB	w(2) = 1;	proCI	Increase	Increase	in-out	1	15625103	rat cardiac fibroblast	H proline assay and western	14726474, 10864917	rat CF, Hproline assay and western (2); human CF, expression and protein; rat CF, H proline
v2	TGFB	w(2) = 1;	proCIII	Increase	Increase	in-out	1	15625103	rat cardiac fibroblast	H proline assay	10864917	rat CF, H proline(1); rat CF, H proline
v3	TGFB	w(2) = 1;	aSMA	Increase	Increase	in-out	1	15625103	rat cardiac fibroblast	IF and western and PCR time series (3)	14726474, 11600408, 23845590, 24085841, 23583823	human CF, PCR; rat CF, western and IF; rat CF, IF and western (dose); rat CF, western time; rat CF, western; human CF, pcr/western/IF
v4	TGFB	w(2) = 1;	PAI1	Increase	Increase	in-out	1	14726474	human primary cardiac fibroblasts	PCR time series (2)	10715259	disease human CF, mRNA
v5	TGFB	w(2) = 1;	fibronectin	Increase	Increase	in-out	1	11600408	adult male rat cardiac fibroblasts	elisa	14726474	human CF, expression and protien
v6	TGFB	w(2) = 1;	proMMP2	Increase	Increase	in-out	1	15194465	adult rat cardiac fibroblast	western (time)
v7	TGFB	w(2) = 1;	proMMP14	Increase	Increase	in-out	1	15194465	adult rat cardiac fibroblast	western with high change (2)
v8	TGFB	w(2) = 1;	CTGF	Increase	Increase	in-out	1	23583823	human atrial cardiac fibroblasts	western, PCR had no change (2)	14726474	human CF, PCR
v9	TGFB	w(2) = 1;	IL6	Increase	Increase	in-out	1	14726474	human primary cardiac fibroblasts	PCR, increase then decrease	23583823	human atrial cells: significant but not large increase in secretion (1)
v10	TGFB	w(2) = 1;	TIMP2	Increase	Increase	in-out	1	15194465	adult male rat cardiac fibroblasts	western (time)	17967775	mouse CF, western
v11	TGFB	w(2) = 1;	latentTGFB	Increase	Increase	in-out	1	10715259	disease human cardiac fibroblast	western time series
v12	AngII	w(1) = 1;	proCI	Increase	Increase	in-out	1	23141425	adult rat cardiac fibroblast	hydroxyproline and PCR	23526266, 15625103, 12480812, 18278065	rat CF, PCR;rat CF, H proline and PCR (2); rat CF, H proline; rat CF, PCR
v13	AngII	w(1) = 1;	proCIII	Increase	Increase	in-out	1	23141425	adult rat cardiac fibroblast	hydroxyproline and PCR	23526266, 12480812, 15625103, 18278065	rat CF, PCR; rat CF, H proline; rat CF H proline (1); rat CF, PCR
v14	AngII	w(1) = 1;	aSMA	Increase	Increase	in-out	1	11600408	adult rat cardiac fibroblast	IF and western	15625103	rat CF, western and IF (3)
v15	AngII	w(1) = 1;	PAI1	Increase	Increase	in-out	1	18278065	neonatal rat cardiac fibroblast	PCR, western in cell and secreted, and IF	10715259	diseased human CF, time mRNA
v16	AngII	w(1) = 1;	ET1	Increase	Increase	in-out	1	7635942	neonatal rat cardiac fibroblast	PCR, dose response
v17	AngII	w(1) = 1;	CTGF	Increase	Increase	in-out	1	23141425	adult rat cardiac fibroblasts	PCR and western
v18	AngII	w(1) = 1;	proMMP2	Increase	Increase	in-out	1	23526266	rat cardiac fibroblast	zymogram and PCR
v19	AngII	w(1) = 1;	proMMP9	Increase	Increase	in-out	1	23526266	rat cardiac fibroblast	zymogram and PCR
v20	AngII	w(1) = 1;	fibronectin	Increase	Increase	in-out	1	11600408	adult male rat cardiac fibroblasts	elisa, not affected by anti-tgfb	10715259, 23141425, 18278065	rat CF, PCR time series; rat CF, western; rat CF, PCR
v21	AngII	w(1) = 1;	latentTGFB	Increase	Increase	in-out	1	18278065	neonatal rat cardiac fibroblast	western (2)	10715259	diseased human CF, western time series
v22	tension	w(3) = 1;	proCI	Increase	Increase	in-out	1	15254965	neonatal and adult rat cardiac fibroblasts	silastic coated membrane, 5% cyclic for 12hr, PCR and western	17686880, 14985070, 2054929	rat CF, RNA protection assay; rat CF, mRNA level (1); rat CF northern time and ISH (3)
v23	tension	w(3) = 1;	proCIII	Increase	Increase	in-out	1	2054929	neonatal rat cardiac fibroblast	cyclic and static, northern blot time and in situ hybridization (3)	17686880	rat CF, RNA protection assay(1);	15254965	neonatal rat CF, PCR and western show no change (2)
v24	tension	w(3) = 1;	aSMA	Increase	Increase	in-out	1	12842814	rat cardiac fibroblasts	IF, mRNA following increased time on stiff substrate or application of force	29599211	rat CF, western
v25	tension	w(3) = 1;	latentTGFB	Decrease	Increase	in-out	0	10939632	neonatal rat cardiac fibroblast	time series of HPLC measure of TGFB in conditioned media	29599211	rat CF, western
v26	TNFa	w(6) = 1;	proCI	Increase	Increase	in-out	1	21893029	adult rat cardiac fibroblasts	western (1)	11070088		10864917, 12480812	rat CF, H proline assay; rat CF, proline assay
v27	TNFa	w(6) = 1;	proCIII	Increase	Increase	in-out	1	21893029	adult rat cardiac fibroblasts	western (1)	11070088		10864917, 12480812	rat CF, H proline assay; rat CF, proline assay
v28	TNFa	w(6) = 1;	proMMP9	Increase	Increase	in-out	1	15537504	human atrial cardiac fibroblast	zymogram and PCR dose response (3)			20619343	human CF, PCR
v29	TNFa	w(6) = 1;	proMMP2	Increase	Increase	in-out	1	15194465	adult rat cardiac fibroblast	western	12480812	rat CF, zymography and western dose response	20619343	human atrial, no change in PCR
v30	TNFa	w(6) = 1;	TIMP1	Increase	Increase	in-out	1	12480812	neonatal rat cardiac fibroblast	western dose response
v31	TNFa	w(6) = 1;	latentTGFB	Increase	Increase	in-out	1	21893029	adult rat cardiac fibroblast	western dose response
v32	IL1	w(5) = 1;	proCI	Decrease	Decrease	in-out	1	10864917	rat cardiac fibroblast	H proline assay, northern blot
v33	IL1	w(5) = 1;	proCIII	Decrease	Decrease	in-out	1	10864917	rat cardiac fibroblast	H proline assay, northern blot
v34	IL1	w(5) = 1;	aSMA	Decrease	No Change	in-out	0	23583823	human atrial cardiac fibroblasts	decrease via pcr, no change via western/IF
v35	IL1	w(5) = 1;	proMMP1	Increase	Increase	in-out	1	20619343	human atrial cardiac fibroblasts	PCR time series
v36	IL1	w(5) = 1;	proMMP9	Increase	Increase	in-out	1	20619343	human atrial cardiac fibroblast	PCR time series	17706606	rat CF, western and zymography
v37	IL1	w(5) = 1;	proMMP2	Increase	No Change	in-out	0	20619343	human atrial cardiac fibroblast	PCR time series	17706606	rat CF, western and zymography
v38	IL1	w(5) = 1;	IL6	Increase	Increase	in-out	1	23583823	human atrial cardiac fibroblast	PCR and ELISA (3)
v39	IL1	w(5) = 1;	CTGF	Decrease	No Change	in-out	0	23583823	human atrial cardiac fibroblasts	western, PCR showed a decrease (2)
v40	Forskolin	w(11) = 1;	proCI	Decrease	Decrease	in-out	1	15625103	adult rat cardiac fibroblast	western	23845590	rat CF, pro collagen western
v41	Forskolin	w(11) = 1;	aSMA	Decrease	Decrease	in-out	1	15625103	adult rat cardiac fibroblast	western and IF
v42	NE	w(7) = 1;	proCI	Decrease	Decrease	in-out	1	19575289	adult rat cardiac fibroblast	sirius red and western, up with low dose and down with high	23845590, 20637865, 25134464	rat CF, pro collagen western, .8 fold change; rat CF, IF (1); human CF, H proline and IF and western (2)	22914642	rat CF, western and PCR, 2fold increase
v43	NE	w(7) = 1;	proMMP2	Increase	Increase	in-out	1	22914642	adult rat cardiac fibroblast	zymogram	20167215	rat CF, western (1)
v44	NE	w(7) = 1;	latentTGFB	No Change	Increase	in-out	0	19575289	adult rat cardiac fibroblast	elisa and PCR dose and time response
v45	NE	w(7) = 1;	IL6	Increase	Increase	in-out	1	12619890	rat cardiac fibroblast	western and RPA time course (3)
v46	IL6	w(4) = 1;	proCI	Decrease	Decrease	in-out	1	10864917	neonatal and adult rat cardiac fibroblasts	H proline assay (1), northern blot
v47	IL6	w(4) = 1;	proCIII	Decrease	Decrease	in-out	1	10864917	neonatal and adult rat cardiac fibroblasts	H proline assay (1), northern blot
v48	ET1	w(9) = 1;	proCI	Increase	Increase	in-out	1	17533154	neonatal rat cardiac fibroblast	H proline
v49	ET1	w(9) = 1;	proCIII	Increase	Increase	in-out	1	17533154	neonatal rat cardiac fibroblast	H proline
v50	ET1	w(9) = 1;	aSMA	Increase	Increase	in-out	1	17533154	neonatal rat cardiac fibroblast	IF and western dose response
v51	PDGF	w(8) = 1;	proCI	Increase	Increase	in-out	1	23585135	adult rat cardiac fibroblast	western dose and time response	25628782	rat CF, PCR huge change and western (2)
v52	PDGF	w(8) = 1;	proCIII	Increase	Increase	in-out	1	25628782	neonatal rat CF	PCR huge change and western (2)
v53	PDGF	w(8) = 1;	aSMA	Increase	Increase	in-out	1	23585135	adult rat cardiac fibroblast	western (1)	25628782, 24427322	rat CF, IF
v54	PDGF	w(8) = 1;	proMMP1	Increase	Increase	in-out	1	23585135	adult rat cardiac fibroblast	western (1)	25628782	rat CF, IF (1)
v55	PDGF	w(8) = 1;	latentTGFB	Increase	Increase	in-out	1	23585135	adult rat cardiac fibroblast	western and mRNA (2)
v56	NP	w(10) = 1;	proCI	Decrease	No Change	in-out	0	23526266	rat cardiac fibroblast	PCR time response (2)	14726474	human CF, PCR and western
v57	NP	w(10) = 1;	CTGF	Decrease	No Change	in-out	0	14726474	human cardiac fibroblast	PCR time series (2)
v58	NP	w(10) = 1;	fibronectin	Decrease	No Change	in-out	0	14726474	human cardiac fibroblast	gene expression time series and protein (3)
v59	NP	w(10) = 1;	aSMA	Decrease	No Change	in-out	0	14726474	human cardiac fibroblast	PCR time series (2)
v60	NP	w(10) = 1;	IL6	No Change	No Change	in-out	1	14726474	human cardiac fibroblast	PCR time series (2)
v61	NP	w(10) = 1;	PAI1	Decrease	No Change	in-out	0	14726474	human cardiac fibroblast	PCR time series (2)
v62	NP	w(10) = 1;	proCIII	Decrease	No Change	in-out	0	23526266	rat cardiac fibroblast	PCR, hydroxyproline assay (2)
v63	NP	w(10) = 1;	proMMP9	No Change	No Change	in-out	1	23526266	rat cardiac fibroblast	zymogram and PCR
v64	NP	w(10) = 1;	proMMP2	No Change	No Change	in-out	1	23526266	rat cardiac fibroblast	zymogram and PCR
v65	AngII		Akt	NA	Increase	in-med	0	12763754	rat cardiac fibroblast	western dose-response
v66	AngII		ERK	NA	Increase	in-med	0	20942814	rat cardiac fibroblast	western
v67	AngII		p38	NA	Increase	in-med	0	20942814	rat cardiac fibroblast	western
v68	AngII		PKC	NA	Increase	in-med	0	7977694	neonatal rat cardiac fibroblast	substrate activity assay, time series (transient increase only)
v69	ET1		Akt	NA	Increase	in-med	0	19188658	human fetal lung fibroblast	western time series + dose-response	15047866	human LF, western time series
v70	ET1		CREB	NA	Increase	in-med	0	10756114	rat cardiac fibroblast	western
v71	ET1		ERK	NA	Increase	in-med	0	19188658	human fetal lung fibroblast	western time series	15047866	human LF, western time series
v72	ET1		JNK	NA	Increase	in-med	0	19188658	human fetal lung fibroblast	western time series
v73	ET1		p38	NA	Increase	in-med	0	19188658	human fetal lung fibroblast	western time series	15047866	human LF, western time series
v74	ET1		PKC	NA	Increase	in-med	0	10756114	rat cardiac fibroblast	western
v75	IL1		Akt	NA	Increase	in-med	0	25036265	rat cardiac fibroblast	western
v76	IL1		ERK	NA	Increase	in-med	0	25036265	rat cardiac fibroblast	western	10807932	rat PF, western
v77	IL1		fibronectin	NA	No Change	in-out	0	11132772	human lung fibroblast	enzyme immunoassay
v78	IL1		JNK	NA	Increase	in-med	0	25036265	rat cardiac fibroblast	western	10807932	rat PF, western
v79	IL1		p38	NA	Increase	in-med	0	25036265	rat cardiac fibroblast	western	10807932	rat PF, western
v80	IL1		PKC	NA	Increase	in-med	0	9245485	mouse embryonic fibroblast	western dose-response
v81	IL1		proMMP3	NA	Increase	in-out	0	23583823	human atrial cardiac fibroblast	PCR time series, ELISA
v82	IL1		smad7	NA	Increase	in-med	0	20544797	human dermal fibroblast	PCR dose-response
v83	IL1		TNC	NA	Increase	in-out	0	23454256	human atrial cardiac fibroblast	PCR, western
v84	NP		ERK	NA	Increase	in-med	0	14726474	human cardiac fibroblast	western
v85	NP		periostin	NA	No Change	in-out	0	30998392	mouse cardiac fibroblast	PCR dose-response
v86	NP		ROS	NA	No Change	in-med	0	23526266	rat cardiac fibroblast	IF, for DCF
v87	PDGF		Akt	NA	Increase	in-med	0	25628782	neonatal rat cardiac fibroblast	PCR, western	30323067	mouse EF
v88	PDGF		CREB	NA	Increase	in-med	0	10406459	mouse embryonic fibroblast	western time series
v89	PDGF		ERK	NA	Increase	in-med	0	19136609	mouse cardiac fibroblast	western time series	30323067	mouse EF
v90	PDGF		FAK	NA	No Change	in-med	0	19136609	mouse cardiac fibroblast	western time series
v91	PDGF		fibronectin	NA	Increase	in-out	0	11132772	human lung fibroblast	enzyme immunoassay
v92	PDGF		JNK	NA	Increase	in-med	0	19136609	mouse cardiac fibroblast	western time series
v93	PDGF		p38	NA	Increase	in-med	0	19136609	mouse cardiac fibroblast	western time series
v94	PDGF		PKC	NA	Increase	in-med	0	7977694	neonatal rat cardiac fibroblast	substrate activity assay, time series
v95	PDGF		proMMP3	NA	No Change	in-out	0	11132772	human lung fibroblast	zymogram
v96	tension		CTGF	NA	Increase	in-out	0	29599211	rat cardiac fibroblast	western, 20% equibiaxial stretch
v97	tension		ERK	NA	Increase	in-med	0	9435301	rat cardiac fibroblast	in vitro kinase assay, immunoblotting time course, 4% equibiaxial cyclic stretch
v98	tension		JNK	NA	Increase	in-med	0	9435301	rat cardiac fibroblast	in vitro kinase assay, immunoblotting time course, 4% equibiaxial cyclic stretch	19834007	rat CF, western
v99	tension		p38	NA	No Change	in-med	0	9435301	rat cardiac fibroblast	in vitro kinase assay, immunoblotting time course, 4% equibiaxial cyclic stretch
v100	tension		ROS	NA	Increase	in-med	0	19834007	rat cardiac fibroblast	IF, for DCF
v101	tension		smad3	NA	Increase	in-med	0	29599211	rat cardiac fibroblast	western, 20% equibiaxial stretch
v102	TGFB		Akt	NA	Increase	in-med	0	28330809	neonatal rat CF	western	17113264, 14576166	human LF, western
v103	TGFB		ET1	NA	Increase	in-out	0	19188658	human fetal lung fibroblast	PCR time series, ELISA
v104	TGFB		FAK	NA	Increase	in-med	0	17113264	human lung fibroblast	western
v105	TGFB		NFAT	NA	Increase	in-med	0	23564462	mouse embryonic fibroblast	IF and PCR, dose-response
v106	TGFB		p38	NA	Increase	in-med	0	28905939	human cardiac fibroblast	western	14576166	human LF, western time series
v107	TGFB		periostin	NA	Increase	in-out	0	30998392	mouse cardiac fibroblast	PCR dose-response
v108	TGFB		proMMP3	NA	No Change	in-out	0	23583823	human atrial cardiac fibroblast	PCR time series, ELISA
v109	TGFB		smad3	NA	Increase	in-med	0	28905939	human cardiac fibroblast	western
v110	TGFB		smad7	NA	No Change	in-med	0	28905939	human cardiac fibroblast	western
v111	TGFB		TIMP1	NA	Increase	in-out	0	17967775	mouse cardiac fibroblast	western
v112	TGFB		TNC	NA	Increase	in-out	0	17967775	mouse cardiac fibroblast	western
v113	TNFa		Akt	NA	No Change	in-med	0	25036265	rat cardiac fibroblast	western
v114	TNFa		ERK	NA	Increase	in-med	0	25036265	rat cardiac fibroblast	western
v115	TNFa		fibronectin	NA	No Change	in-out	0	11132772	human lung fibroblast	enzyme immunoassay
v116	TNFa		JNK	NA	Increase	in-med	0	25036265	rat cardiac fibroblast	western
v117	TNFa		p38	NA	Increase	in-med	0	15537504	human atrial cardiac fibroblast	western	10807932	rat PF, western
v118	TNFa		proMMP1	NA	Increase	in-out	0	11132772	human lung fibroblast	zymogram
v119	TNFa		proMMP3	NA	No Change	in-out	0	11132772	human lung fibroblast	zymogram
v120	TNFa		smad3	NA	No Change	in-med	0	12426318	human dermal fibroblast	electrophoretic mobility shift assay
