# Supplementary figures and images for: Fibroblast mechanotransduction network predicts targets for mechano-adaptive infarct therapies
Source: eLife journal article supplement (doi:10.7554/elife.62856), 2022-02-09

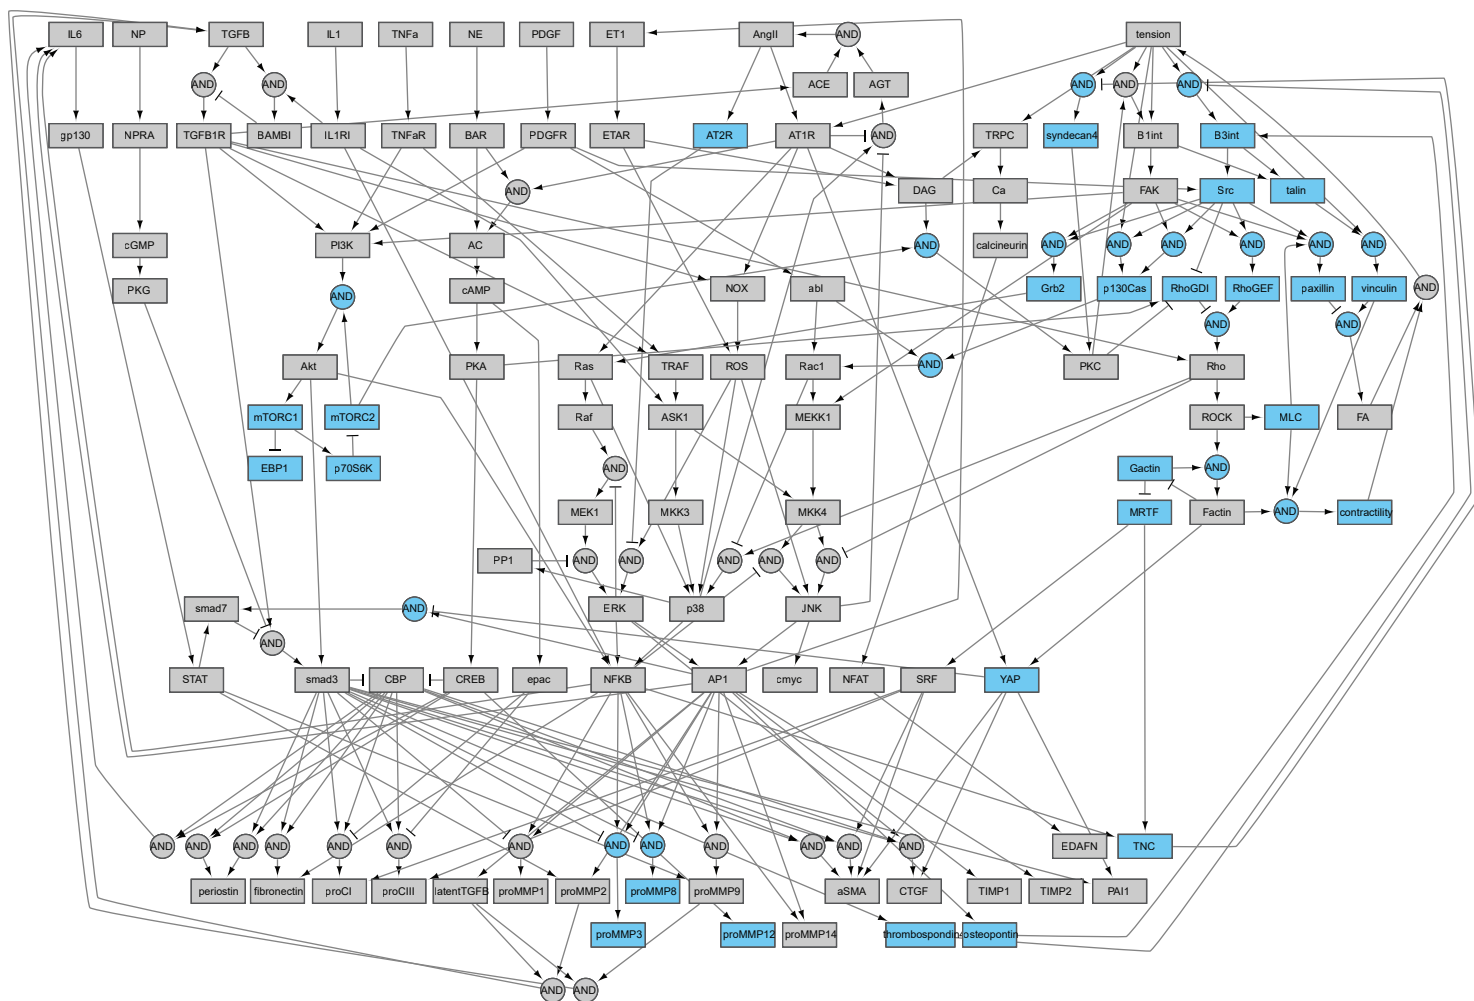

Supplement: supp [file elife-62856-supp-v1.zip › elife_poa_e62856_Figure_1_figure_supplement_1.pdf]

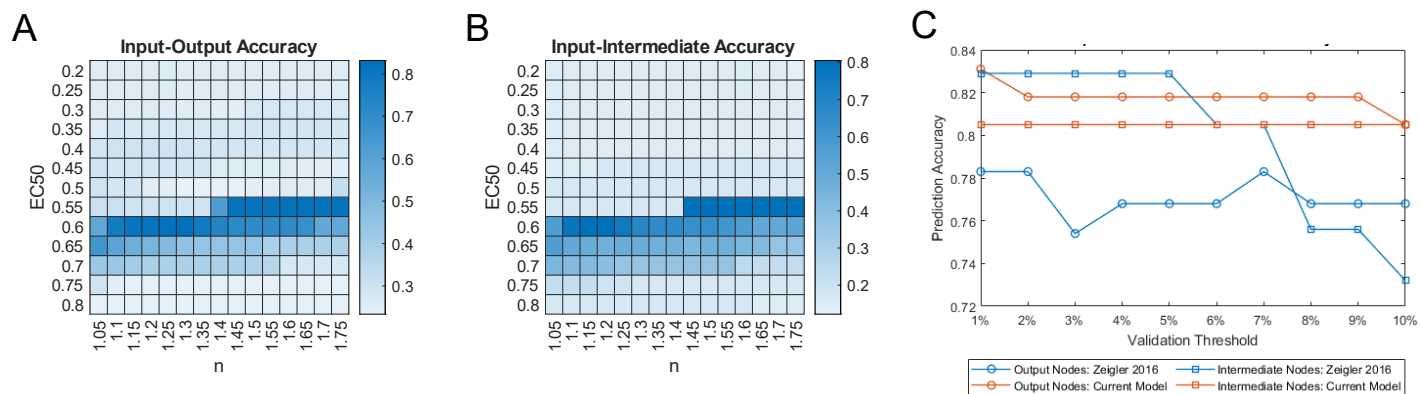

Supplement: supp [file elife-62856-supp-v1.zip › elife_poa_e62856_Figure_2_figure_supplement_1.pdf]

A

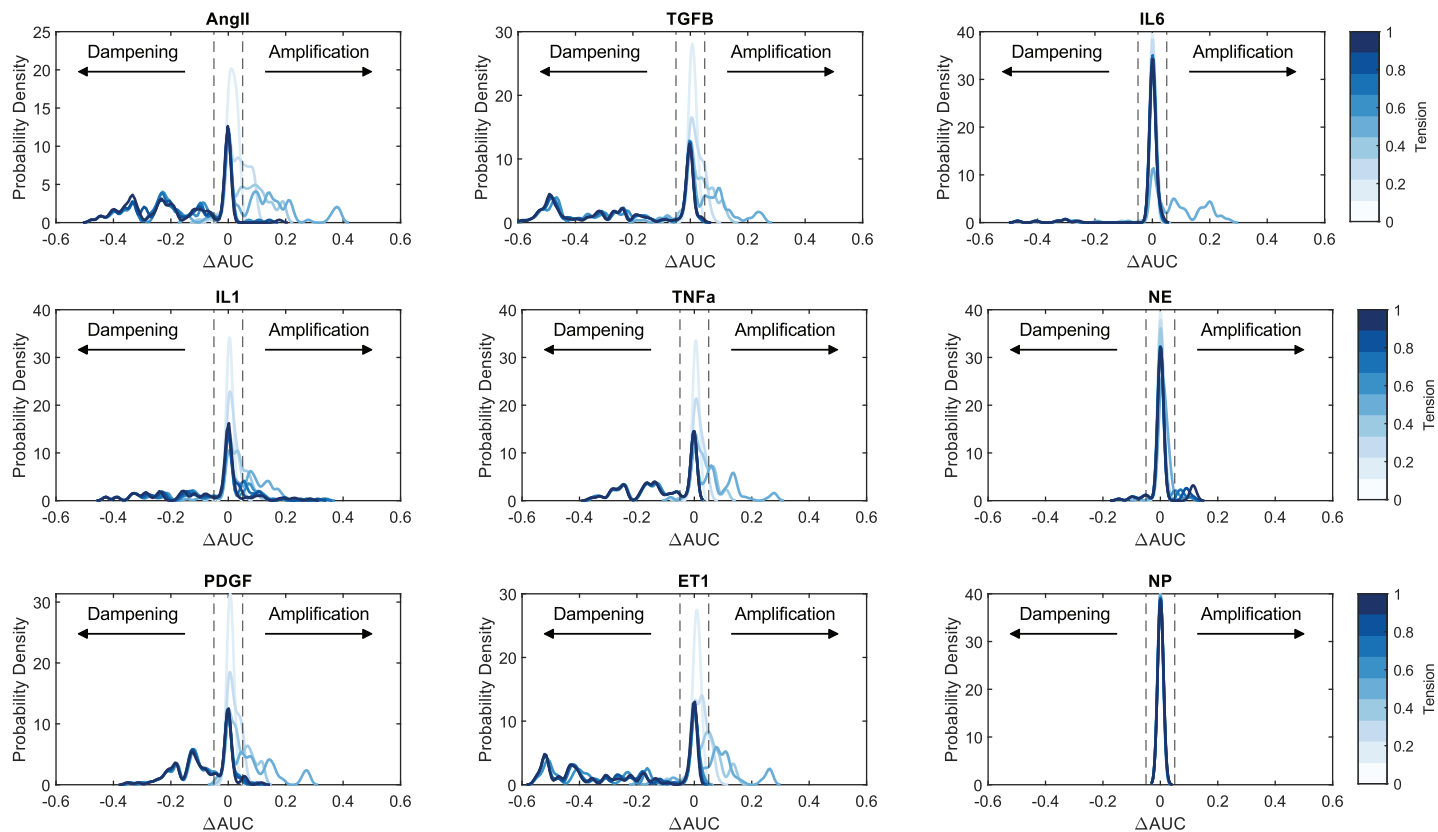

B

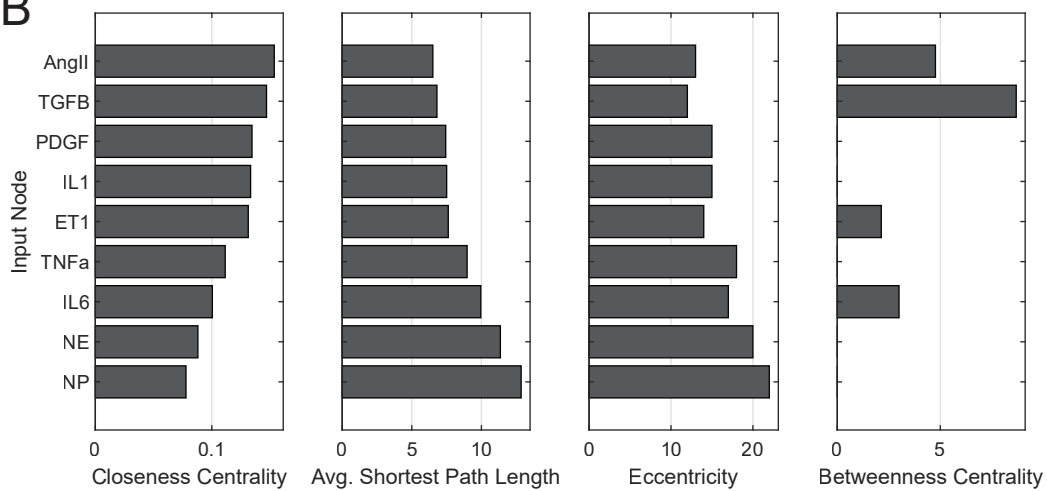

Supplement: supp [file elife-62856-supp-v1.zip › elife_poa_e62856_Figure_3_figure_supplement_1.pdf]

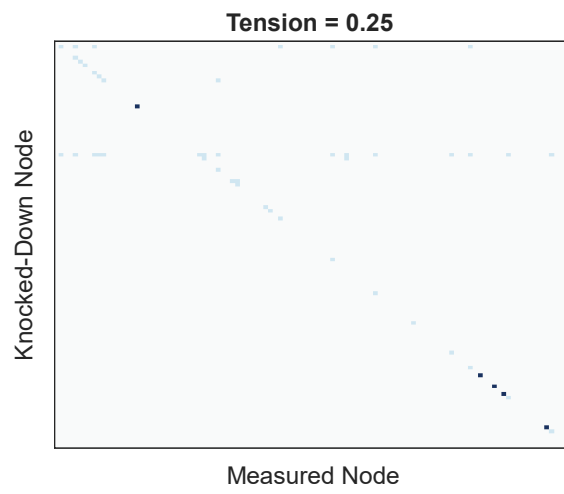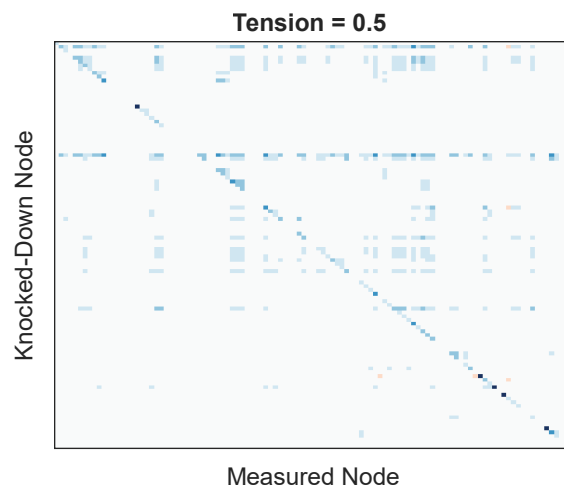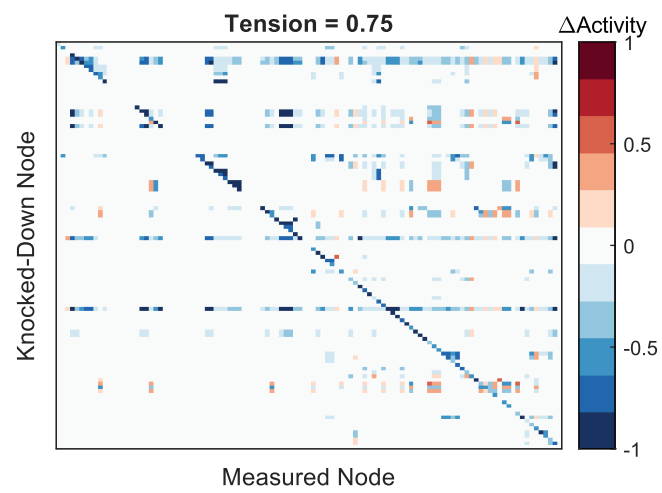

Supplement: supp [file elife-62856-supp-v1.zip › elife_poa_e62856_Figure_4_figure_supplement_1.pdf]

A

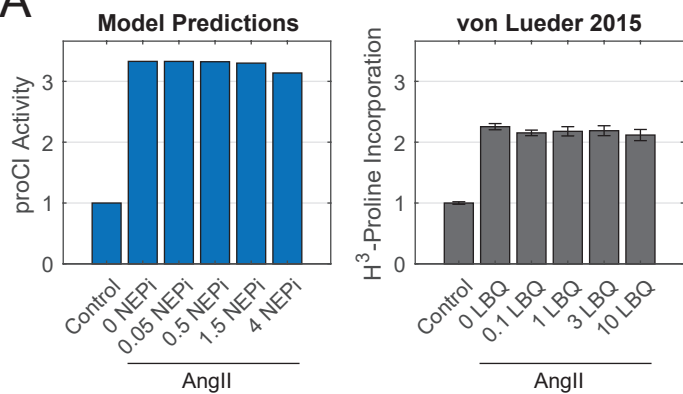

B

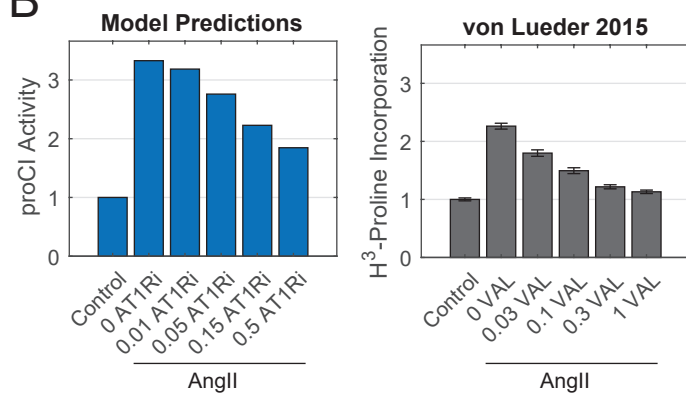

C

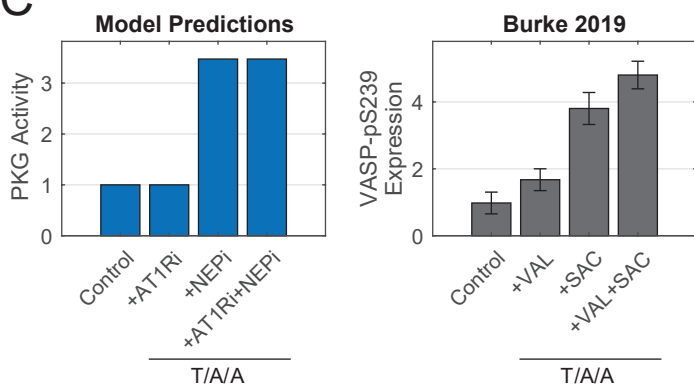

D

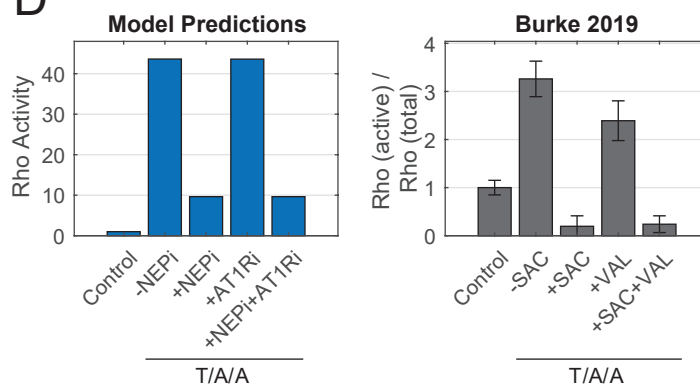

Supplement: supp [file elife-62856-supp-v1.zip › elife_poa_e62856_Figure_5_figure_supplement_1.pdf]

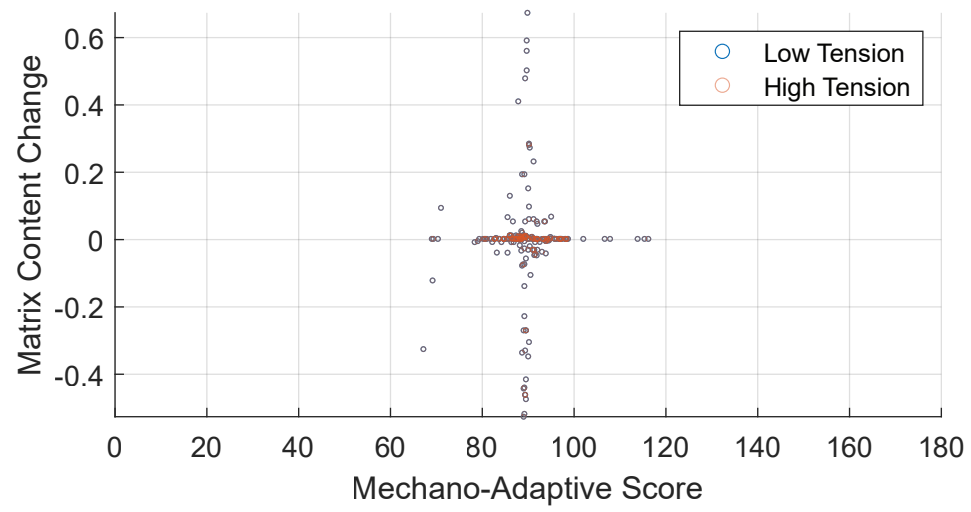

Supplement: supp [file elife-62856-supp-v1.zip › elife_poa_e62856_Figure_6_figure_supplement_1.pdf]
